# Supplementary material for: Elastic properties of natural single nanofibres
Source: Royal Society of Chemistry journal article supplement (doi:10.1039/c3ra47452f), 2014-01-01
Supplement: c3ra47452f1.pdf [file c3ra47452f1.pdf]

Electronic supplementary information for  
**RSC Advances**

**Elastic properties of natural single nanofibers**

*F.M. Fernandes<sup>a§\*</sup>, L. Vázquez<sup>a</sup>, E. Ruiz-Hitzky<sup>a</sup>, A. Carnicero<sup>b</sup> and M. Castro<sup>c</sup>,*

<sup>a</sup> Instituto de Ciencia de Materiales de Madrid, CSIC, C/ Sor Juana Inés de la Cruz, 3, 28049 Madrid, Spain

<sup>§</sup> F.M.F is presently at the Laboratoire de Chimie de la Matière Condensée de Paris, UPMC Univ. Paris 06, UMR7574, Collège de France. 11 Place Marcelin Berthelot, 75231 Paris cedex 05, France.

E-mail: francisco.fernandes@upmc.fr

<sup>b</sup> Departamento de Ingeniería Mecánica and DNL, Universidad Pontificia Comillas, Madrid, Spain.

<sup>c</sup> GISC and Grupo de Dinámica No Lineal, Universidad Pontificia Comillas, Madrid, Spain.

**Table S1 – Elastic measurements conditions summary.**

| Topographic image of deposited fibers                                               | Sample Name | $k / \text{Nm}^{-1}$ | Sensitivity / $\text{nmV}^{-1}$ | Fiber Dimensions / nm             | E / GPa |
|-------------------------------------------------------------------------------------|-------------|----------------------|---------------------------------|-----------------------------------|---------|
| 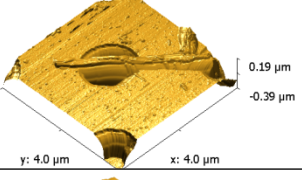   | S1.Lk       | 0.76                 | 63.38                           | x = 616<br>L = 1488<br><r> = 37.8 | 8.15    |
|    | S2.Lk       | 0.76                 | 63.38                           | x = 474<br>L = 1440<br><r> = 51.5 | 10.32   |
|    | S3.Lk       | 0.76                 | 63.38                           | x = 721<br>L = 1500<br><r> = 58.8 | 4.82    |
|   | S4.Hk       | 1.74                 | 64.85                           | x = 430<br>L = 916<br><r> = 30.0  | 11.46   |
|  | S2.Hk       | 1.74                 | 64.85                           | x = 482<br>L = 1440<br><r> = 52.6 | 8.60    |
|  | S3.Hk       | 1.74                 | 64.85                           | x = 721<br>L = 1500<br><r> = 58.8 | 6.85    |

## Model for the bending of a clamped elastic beam

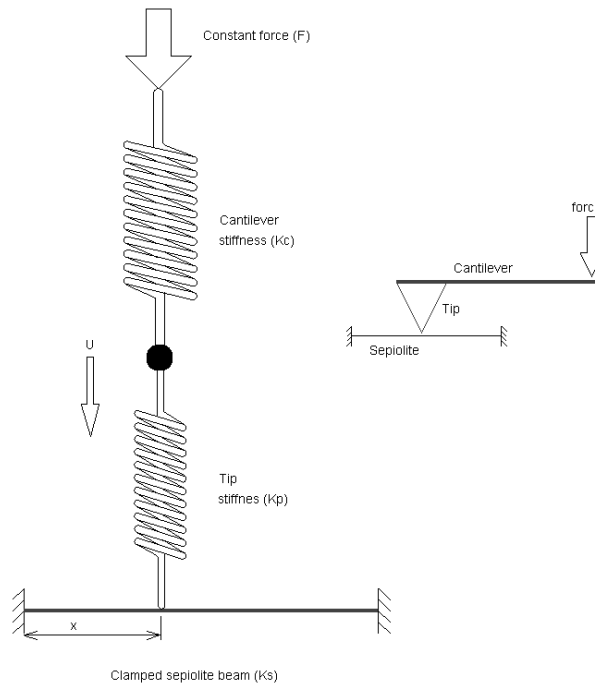

**Figure S1.** Lumped stiffness model of the tip-clamped sepiolite fiber ensemble.

Figure S1 shows the lumped stiffness model of the tip-fiber group. This model allows to compute the elastic modulus of the sepiolite fiber. In this case, solving the mechanical analogue of the figure, one finds

$$E = \frac{x^3(L-x)^3}{3I_oL^3} \left( \frac{K_p^2}{K_p - F} - K_p \right) \quad (\text{Equation S1})$$

where  $L$  is the length of the clamped fiber,  $I_o$  is the moment of inertia of the section,  $F$  is the applied constant force,  $U$  the measured displacement and  $K_p$  is the stiffness of the tip. When the stiffness of the tip is very high (as in this case) this equation reduces to (Equation 1) in the main text.
